# Supplementary material for: Clopidogrel but Not Prasugrel Significantly Inhibits the CYP2C8‐Mediated Metabolism of Montelukast in Humans
Source: PubMed Central journal article supplement — Clin Pharmacol Ther. 2017 Dec 23;104(3):495–504. doi: 10.1002/cpt.947 (PMC6175296; doi:10.1002/cpt.947), 2017-12-23
Supplement: CPT-104-495-s005.pdf [file CPT-104-495-s005.pdf]

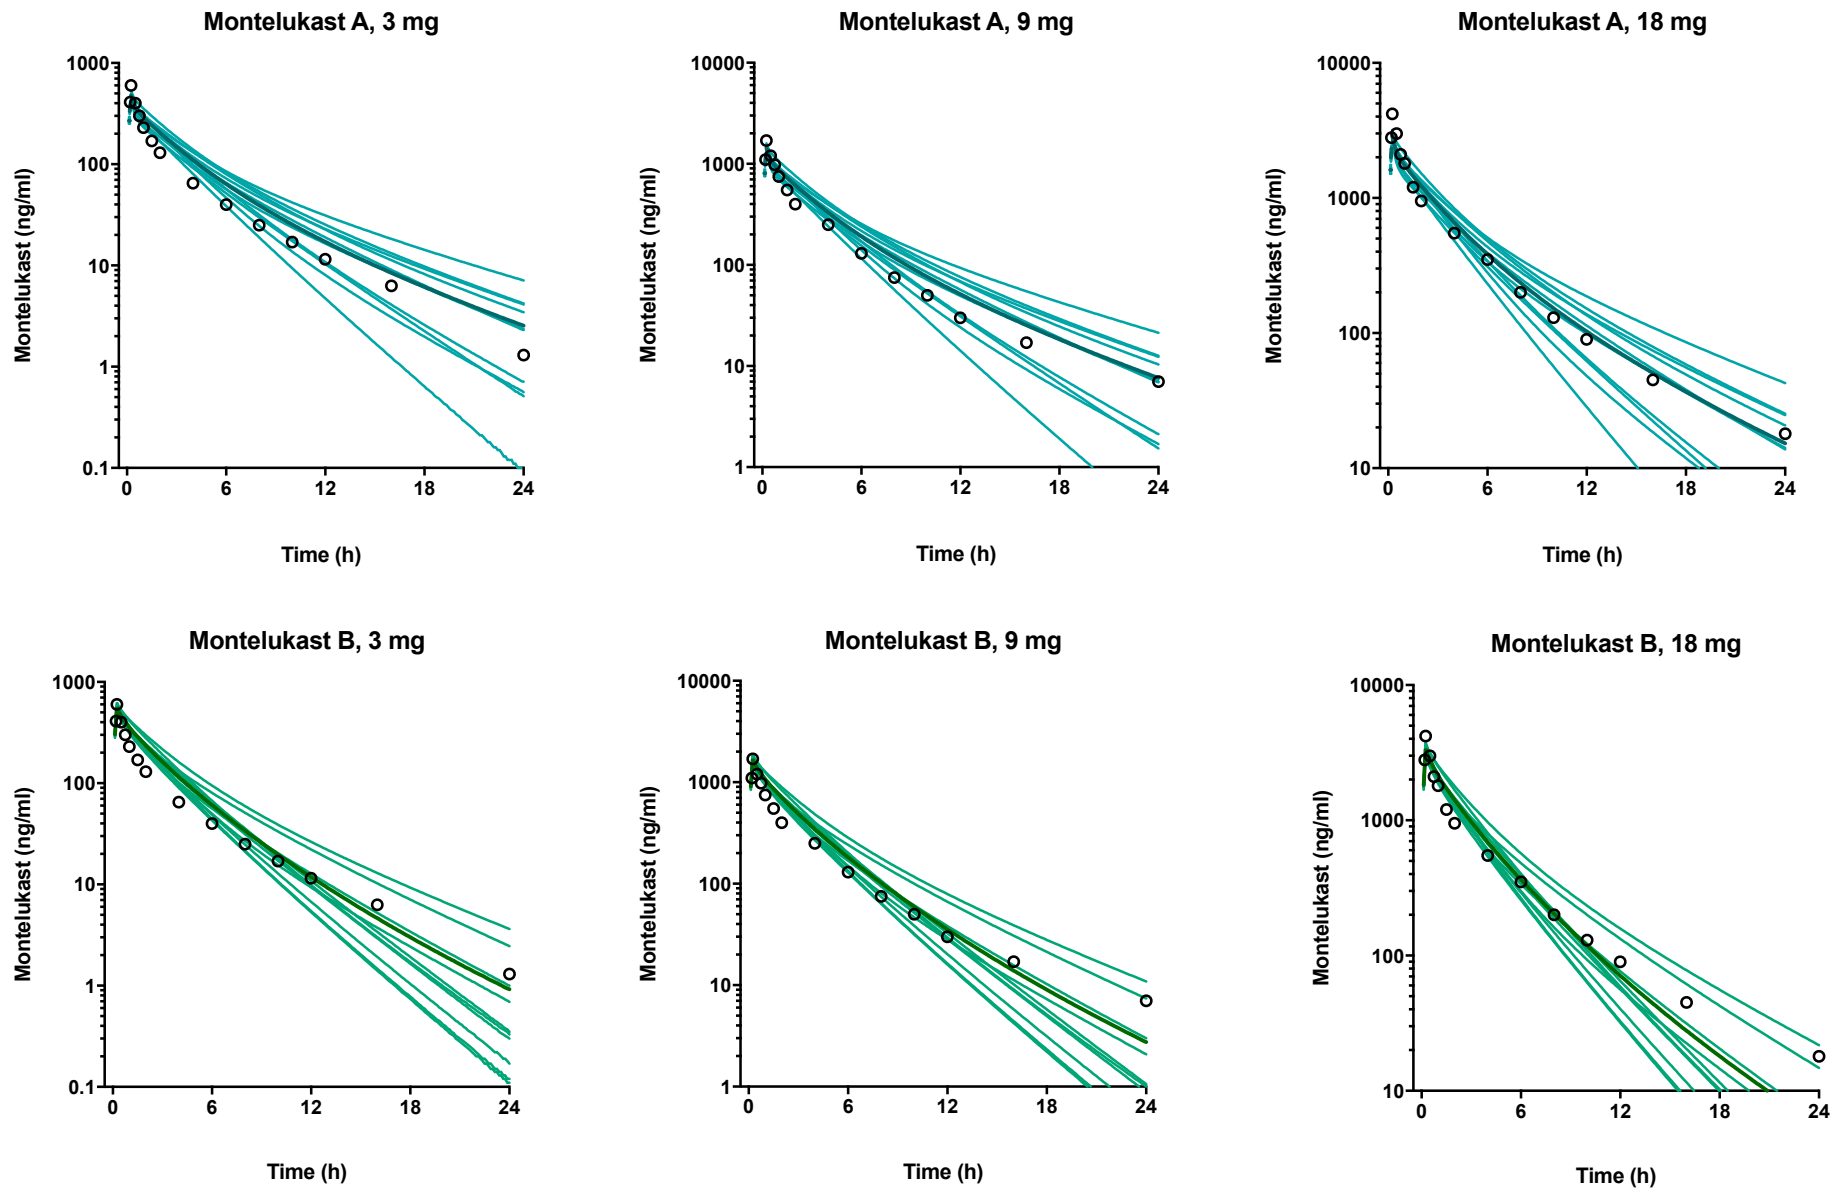

**Figure S1.** PBPK simulations of the plasma concentrations of montelukast A (perfusion-limited distribution;  $f_{m,CYP2C8}=0.55$ ,  $f_{m,CYP3A4}=0.16$ ) and montelukast B (permeability-limited distribution;  $f_{m,CYP2C8}=0.60$ ,  $f_{m,CYP3A4}=0.16$ ) following intravenous administration. Montelukast 3, 9 and 18 mg were administered as 15 min infusions to 6 healthy male subjects. Thin lines represent individual trials, the thick line represents the mean of ten trials. Circles refer to clinical data from Cheng et al. (1996).
